# Supplementary material for: Nickel oxide thin film from electrodeposited nickel sulfide thin film: peroxide sensing and photo-decomposition of phenol
Source: Royal Society of Chemistry journal article supplement (doi:10.1039/c4dt01658k), 2014-01-01
Supplement: c4dt01658k1.pdf [file c4dt01658k1.pdf]

## **SUPPORTING INFORMATION (SI)**

### **Nickel oxide thin film from electrodeposited Nickel sulfide thin film: Peroxide sensing and photo-decomposition of phenol**

#### **Figure captions:**

S1. (a) UV- Vis spectrum of NiS, inset Tauc plot.

S2. EDAX data of NiS thin film

Table1. Performances of different H<sub>2</sub>O<sub>2</sub> sensors.

### **Optical studies**

The absorption spectrum (Figure S1) of NiS shows a sharp change around 460 nm. Optical band gaps were calculated from the absorbance data by plotting  $(\alpha h\nu)^2$  versus  $h\nu$  and extrapolating the linear portion of the curve to the x-axis;  $\alpha$  being the absorption coefficient and  $h\nu$  the photon energy. The direct band gap ( $E_g$ ) measured from the absorption value was found to be 2.69 eV, which is blue shifted to 0.59 eV over bulk NiS (2.10 eV).

### **EDAX analysis**

The elemental analysis was carried out by the EDX probe associated with FESEM and the Ni:S ratio was found close to unit (Figure S2)

## Figures

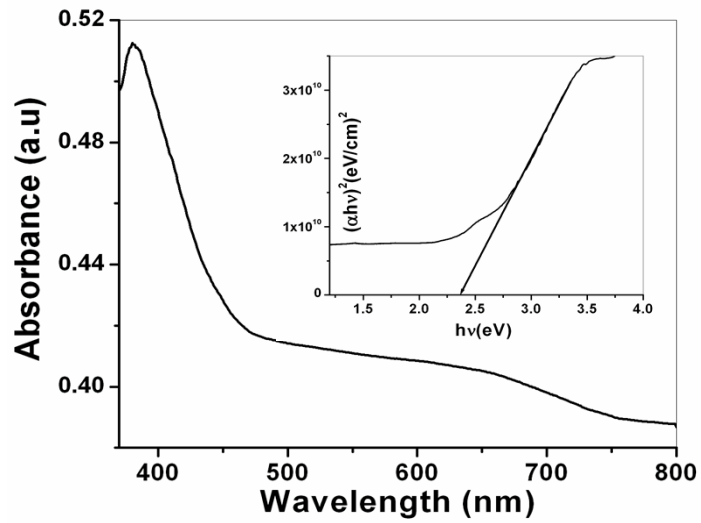

Figure S1 (a) UV- Vis spectrum of NiS, inset Tauc plot.

Spectrum processing :

Peaks possibly omitted : 1.485, 3.325 keV

Processing option : All elements analyzed (Normalised)

Number of iterations = 2

Standard :

S FeS2 1-Jun-1999 12:00 AM

Ni Ni 1-Jun-1999 12:00 AM

| Element | Weight% | Atomic% |
|---------|---------|---------|
| S K     | 36.65   | 49.95   |
| Ni K    | 63.35   | 51.05   |
| Totals  | 100.00  |         |

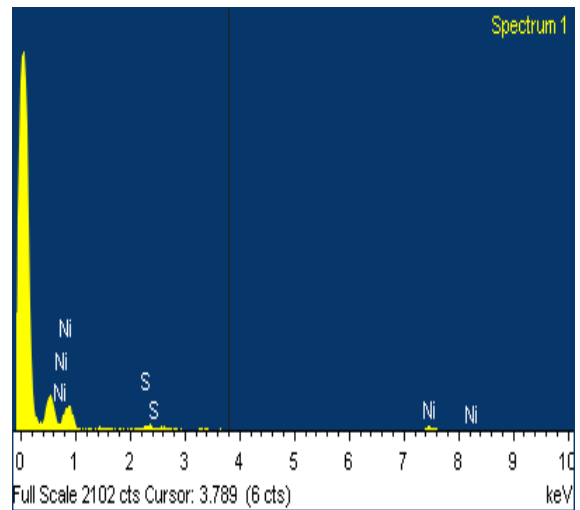

Figure S2: EDAX data of NiS thin film

| Electrode                           | Applied potential (V) | Detection limit     | Sensitivity                 | Linear range                            | Reference    |
|-------------------------------------|-----------------------|---------------------|-----------------------------|-----------------------------------------|--------------|
| HRP                                 | -                     | 1.6 $\mu\text{M}$   | 12.8 $\mu\text{A mM}^{-1}$  | 4 $\mu\text{M}$ to 100 $\mu\text{M}$    | 35           |
| Cytochrome c/Au/C                   | - 0.1 (vs. Ag/AgCl)   | -                   | -                           | 10 $\mu\text{M}$ to 1.0 mM              | 36           |
| AgNPs/ZnONRs/FTO                    | - 0.55 (vs. Ag/AgCl)  | 0.9 $\mu\text{M}$   | 152.1 $\mu\text{A mM}^{-1}$ | 8 $\mu\text{M}$ to 983 $\mu\text{M}$    | 37           |
| ZnO/Au/Nafion/HRP/GCE               | - 0.3 (vs. Ag/AgCl)   | 9.0 $\mu\text{M}$   | -                           | 15 $\mu\text{M}$ to 1.1 mM              | 38           |
| MnO <sub>2</sub> /Nafion/GCE        | + 0.8 (vs. Ag/AgCl)   | 2 $\mu\text{M}$     | -                           | 10 $\mu\text{M}$ to 1.5 mM              | 39           |
| Cu <sub>2</sub> S/OMCs/Nafion/GCE   | - 0.1 (vs. Ag/AgCl)   | 0.2 $\mu\text{M}$   | 36.8 $\mu\text{A mM}^{-1}$  | 1 $\mu\text{M}$ to 3.03 mM              | 40           |
| Co <sub>3</sub> O <sub>4</sub> /GCE | - 0.2 (vs. Ag/AgCl)   | 10 $\mu\text{M}$    | 4.84 $\mu\text{A mM}^{-1}$  | 0 $\mu\text{M}$ to 5.35 mM              | 41           |
| FeS/GCE                             | - 0.4 (vs. Ag/AgCl)   | 0.092 $\mu\text{M}$ | -                           | 0.5 $\mu\text{M}$ to 150 $\mu\text{M}$  | 42           |
| NCNT/GCE                            | + 0.3 (vs. SCE)       | 0.37 $\mu\text{M}$  | 24.5 $\mu\text{A mM}^{-1}$  | 1.76 $\mu\text{M}$ to 139 $\mu\text{M}$ | 43           |
| SWCNT ensemble networks             | -                     | 1.0 mM              | -                           | 1.9 to 24 mM                            | 44           |
| CPE/PNMA(SDS)/Co                    | -                     | 0.018 mM            | -                           | 0.03 mM to 12 mM                        | 45           |
| NiO/ITO electrode                   | + 0.5 (vs. Ag/AgCl)   | 1.28 mM             | 2.3 mA $\text{mM}^{-1}$     | 10 to 1000 $\mu\text{M}$                | Present work |

**Table1.** Performances of different H<sub>2</sub>O<sub>2</sub> sensors.
